# Supplementary material for: Molecular basis of CENP-C association with the CENP-A nucleosome at yeast centromeres
Source: PubMed Central journal article supplement — Genes Dev. 2017 Oct 1;31(19):1958–72. doi: 10.1101/gad.304782.117 (PMC5710141; doi:10.1101/gad.304782.117), 2017-10-01
Supplement: supp_gad.304782.117_Supplemental_Table_S1.pdf [file supp_gad.304782.117_Supplemental_Table_S1.pdf]

GENESDEV-2017-304782, Xiao\_Supplemental Table S2.pdf

|                                         | <i>K. lactis</i> | <i>S. cerevisiae</i> | <i>S. pombe</i> | <i>M. musculus</i> | <i>H. sapiens</i> | <i>G. gallus</i> | <i>X. laevis</i> | <i>C. elegans</i> | <i>D. Melanogaster</i> | <i>A. thaliana</i> | <i>Z. mays</i> |
|-----------------------------------------|------------------|----------------------|-----------------|--------------------|-------------------|------------------|------------------|-------------------|------------------------|--------------------|----------------|
| <b>AT-hook</b>                          | 99.4%            | 99.9%                | 99.5%           | 0%                 | 0%                | 0%               | 0%               | 0%                | 99.9%                  | 0%                 | 0%             |
| <b>SPKK</b>                             | 0%               | 0%                   | 0%              | 0%                 | 0%                | 0%               | 97.0%            | 0%                | 99.5%                  | 0%                 | 0%             |
| <b>RK</b>                               | 98.0%            | 97.4%                | 93.9%           | 97.0%              | 99.1%             | 98.3%            | 99.8%            | 97.1%             | 99.3%                  | 99.3%              | 99.1%          |
|                                         |                  |                      |                 |                    |                   |                  |                  |                   |                        |                    |                |
| <b>CENP-C<br/>Composition<br/>RK/ED</b> | 76 /<br>121      | 77 /<br>113          | 108 /<br>90     | 155 /<br>108       | 162 /<br>127      | 145 /<br>111     | 211 /<br>188     | 138 /<br>138      | 209 /<br>198           | 105 /<br>104       | 98 /<br>109    |
