# Supplementary material for: Molecular basis of CENP-C association with the CENP-A nucleosome at yeast centromeres
Source: PubMed Central journal article supplement — Genes Dev. 2017 Oct 1;31(19):1958–72. doi: 10.1101/gad.304782.117 (PMC5710141; doi:10.1101/gad.304782.117), 2017-10-01
Supplement: supp_gad.304782.117_Supplemental_Table_S2.pdf [file supp_gad.304782.117_Supplemental_Table_S2.pdf]

GENESDEV-2017-304782, Xiao\_Supplemental Table S2.pdf

Cellular component

Molecular function

| GO cellular component complete               | Homo sapiens (REF) | #     | expected | ∇ Fold Enrichment | ±/∓   | P value    |
|----------------------------------------------|--------------------|-------|----------|-------------------|-------|------------|
| pericentriolar heterochromatin               |                    | 18    | 4        | 14                | 28.42 | + 1.84E-02 |
| nuclear transcriptional repressor complex    |                    | 32    | 6        | 25                | 23.98 | + 3.30E-04 |
| DNA topoisomerase complex                    |                    | 78    | 9        | 59                | 15.14 | + 1.40E-05 |
| heterochromatin                              |                    | 72    | 6        | 56                | 10.66 | + 3.31E-02 |
| histone methyltransferase complex            |                    | 72    | 6        | 56                | 10.66 | + 3.31E-02 |
| transcriptional repressor complex            |                    | 87    | 7        | 68                | 10.29 | + 8.68E-03 |
| nuclear speck                                |                    | 158   | 13       | 155               | 8.40  | + 1.00E-05 |
| nuclear body                                 |                    | 355   | 17       | 228               | 6.12  | + 5.07E-06 |
| nucleolus                                    |                    | 739   | 30       | 578               | 5.19  | + 2.02E-10 |
| chromosome                                   |                    | 905   | 31       | 708               | 4.38  | + 5.91E-09 |
| chromatin                                    |                    | 452   | 15       | 346               | 4.34  | + 3.23E-03 |
| nucleolus                                    |                    | 878   | 22       | 687               | 3.20  | + 2.17E-03 |
| chromosomal part                             |                    | 793   | 19       | 620               | 3.06  | + 2.14E-02 |
| nucleolus                                    |                    | 2843  | 62       | 2301              | 2.91  | + 4.90E-14 |
| nuclear lumen                                |                    | 1532  | 77       | 2762              | 2.79  | + 5.75E-16 |
| nuclear part                                 |                    | 3920  | 81       | 3872              | 2.70  | + 5.16E-17 |
| intracellular organelle lumen                |                    | 4197  | 78       | 3438              | 2.27  | + 4.27E-11 |
| organelle lumen                              |                    | 4398  | 78       | 3439              | 2.27  | + 4.32E-11 |
| membrane-enclosed lumen                      |                    | 4398  | 78       | 3439              | 2.27  | + 4.32E-11 |
| intracellular non-membrane-bounded organelle |                    | 3890  | 67       | 3042              | 2.20  | + 3.88E-08 |
| non-membrane-bounded organelle               |                    | 3890  | 67       | 3042              | 2.20  | + 3.88E-08 |
| nucleus                                      |                    | 7006  | 106      | 5479              | 1.93  | + 4.20E-13 |
| macromolecular complex                       |                    | 4908  | 66       | 3838              | 1.72  | + 1.57E-03 |
| intracellular organelle part                 |                    | 8188  | 38       | 8411              | 1.53  | + 9.35E-05 |
| organelle part                               |                    | 8402  | 39       | 8570              | 1.51  | + 1.62E-04 |
| intracellular membrane-bounded organelle     |                    | 10464 | 113      | 8183              | 1.38  | + 8.25E-04 |
| membrane-bounded organelle                   |                    | 12149 | 128      | 9516              | 1.35  | + 7.11E-05 |
| intracellular organelle                      |                    | 12048 | 125      | 9421              | 1.33  | + 5.17E-04 |
| organelle                                    |                    | 13117 | 134      | 10217             | 1.31  | + 1.00E-04 |
| intracellular part                           |                    | 13838 | 133      | 10821             | 1.23  | + 1.82E-02 |
| Unclassified                                 |                    | 2678  | 8        | 2094              | 38    | - 0.0000   |

  

| GO molecular function complete                                                     | Homo sapiens (REF) | #    | expected | ∇ Fold Enrichment | ±/∓   | P value    |
|------------------------------------------------------------------------------------|--------------------|------|----------|-------------------|-------|------------|
| chromo shadow domain binding                                                       |                    | 6    | 3        | .05               | 63.94 | + 4.53E-02 |
| histone methyltransferase activity (H3-K36 specific)                               |                    | 6    | 3        | .05               | 63.94 | + 4.53E-02 |
| histone methyltransferase activity (H3-K4 specific)                                |                    | 18   | 6        | .14               | 42.63 | + 2.43E-05 |
| lysine-acetylated histone binding                                                  |                    | 18   | 5        | .14               | 35.52 | + 1.07E-03 |
| histone-lysine N-methyltransferase activity                                        |                    | 45   | 9        | .35               | 25.58 | + 3.76E-07 |
| protein-lysine N-methyltransferase activity                                        |                    | 57   | 9        | .45               | 20.19 | + 2.91E-06 |
| lysine N-methyltransferase activity                                                |                    | 58   | 9        | .45               | 19.84 | + 3.38E-06 |
| histone methyltransferase activity                                                 |                    | 59   | 9        | .46               | 19.51 | + 3.92E-06 |
| DNA helicase activity                                                              |                    | 57   | 8        | .45               | 17.95 | + 6.19E-05 |
| protein methyltransferase activity                                                 |                    | 84   | 9        | .66               | 13.70 | + 7.98E-05 |
| helicase activity                                                                  |                    | 159  | 17       | 1.24              | 13.67 | + 4.68E-11 |
| DNA-dependent ATPase activity                                                      |                    | 86   | 9        | .67               | 13.38 | + 9.73E-05 |
| N-methyltransferase activity                                                       |                    | 91   | 9        | .71               | 12.65 | + 1.56E-04 |
| purine NTP-dependent ATPase activity                                               |                    | 105  | 8        | .82               | 9.74  | + 5.99E-03 |
| ATP-dependent helicase activity                                                    |                    | 105  | 8        | .82               | 9.74  | + 5.99E-03 |
| S-adenosylmethionine-dependent methyltransferase activity                          |                    | 151  | 11       | 1.18              | 9.32  | + 1.12E-04 |
| histone binding                                                                    |                    | 160  | 10       | 1.25              | 7.99  | + 1.87E-03 |
| methyltransferase activity                                                         |                    | 222  | 11       | 1.74              | 6.34  | + 4.84E-03 |
| transferase activity, transferring one-carbon groups                               |                    | 233  | 11       | 1.82              | 6.04  | + 7.65E-03 |
| chromatin binding                                                                  |                    | 499  | 21       | 3.90              | 5.38  | + 1.41E-06 |
| ATPase activity, coupled                                                           |                    | 336  | 14       | 2.63              | 5.33  | + 1.42E-03 |
| ATPase activity                                                                    |                    | 452  | 17       | 3.53              | 4.81  | + 3.43E-04 |
| nucleoside-triphosphatase activity                                                 |                    | 792  | 27       | 6.19              | 4.36  | + 4.03E-07 |
| pyrophosphatase activity                                                           |                    | 837  | 27       | 6.55              | 4.13  | + 1.34E-06 |
| hydrolase activity, acting on acid anhydrides, in phosphorus-containing anhydrides |                    | 839  | 27       | 6.56              | 4.12  | + 1.41E-06 |
| hydrolase activity, acting on acid anhydrides                                      |                    | 842  | 27       | 6.58              | 4.10  | + 1.52E-06 |
| poly(A) RNA binding                                                                |                    | 1171 | 35       | 9.16              | 3.82  | + 1.88E-08 |
| zinc ion binding                                                                   |                    | 1202 | 28       | 9.40              | 2.98  | + 6.33E-04 |
| RNA binding                                                                        |                    | 1633 | 38       | 12.77             | 2.98  | + 2.74E-06 |
| macromolecular complex binding                                                     |                    | 1355 | 29       | 10.60             | 2.74  | + 2.11E-03 |
| DNA binding                                                                        |                    | 2533 | 53       | 19.81             | 2.68  | + 2.32E-08 |
| ATP binding                                                                        |                    | 1508 | 30       | 11.79             | 2.54  | + 5.90E-03 |
| adenyl ribonucleotide binding                                                      |                    | 1545 | 30       | 12.08             | 2.48  | + 9.58E-03 |
| adenyl nucleotide binding                                                          |                    | 1556 | 30       | 12.17             | 2.47  | + 1.10E-02 |
| transition metal ion binding                                                       |                    | 1459 | 28       | 11.41             | 2.45  | + 2.66E-02 |
| nucleic acid binding                                                               |                    | 4079 | 78       | 31.90             | 2.45  | + 1.29E-12 |
| purine ribonucleoside triphosphate binding                                         |                    | 1856 | 33       | 14.51             | 2.27  | + 1.86E-02 |
| purine ribonucleoside binding                                                      |                    | 1866 | 33       | 14.59             | 2.26  | + 2.08E-02 |
| purine nucleoside binding                                                          |                    | 1869 | 33       | 14.62             | 2.26  | + 2.15E-02 |
