# Supplementary material for: Molecular basis of CENP-C association with the CENP-A nucleosome at yeast centromeres
Source: PubMed Central journal article supplement — Genes Dev. 2017 Oct 1;31(19):1958–72. doi: 10.1101/gad.304782.117 (PMC5710141; doi:10.1101/gad.304782.117), 2017-10-01
Supplement: supp_gad.304782.117_Supplemental_Table_S3.pdf [file supp_gad.304782.117_Supplemental_Table_S3.pdf]

| Fluorophore                | Light source<br>& channel       | Filter cube                |                        |                         |
|----------------------------|---------------------------------|----------------------------|------------------------|-------------------------|
|                            |                                 | Excitation                 | Beamsplitter           | Emission                |
| tdEos<br>(red emission)    | Colibri / LED555 <sup>(1)</sup> | BP550/25 <sup>(1)</sup>    | FT570 <sup>(1)</sup>   | BP605/70 <sup>(1)</sup> |
| tdEos<br>(photoconversion) | Colibri / LED405 <sup>(1)</sup> | FF01-405/10 <sup>(2)</sup> | 59004BS <sup>(3)</sup> | 59004M <sup>(3)</sup>   |

Source: <sup>(1)</sup>Zeiss, <sup>(2)</sup>Semrock, <sup>(3)</sup>Chroma
