# Supplementary figures and images for: Molecular basis of CENP-C association with the CENP-A nucleosome at yeast centromeres
Source: PubMed Central journal article supplement — Genes Dev. 2017 Oct 1;31(19):1958–72. doi: 10.1101/gad.304782.117 (PMC5710141; doi:10.1101/gad.304782.117), 2017-10-01

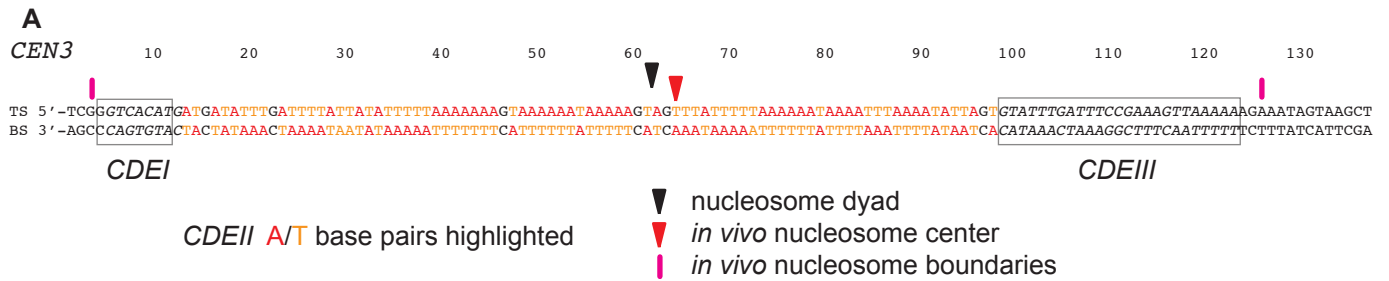

**B** Cse4/*CEN3* Nuc.  
Top strand

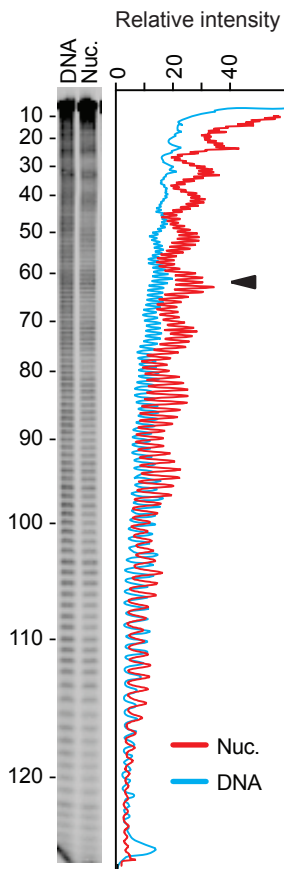

**C** Cse4/*CEN3* Nuc.  
Bottom strand

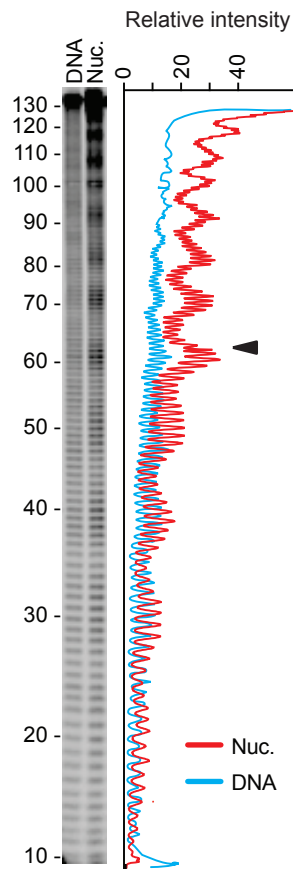

**D** Cse4/*CEN3* Nuc.  
Undigested

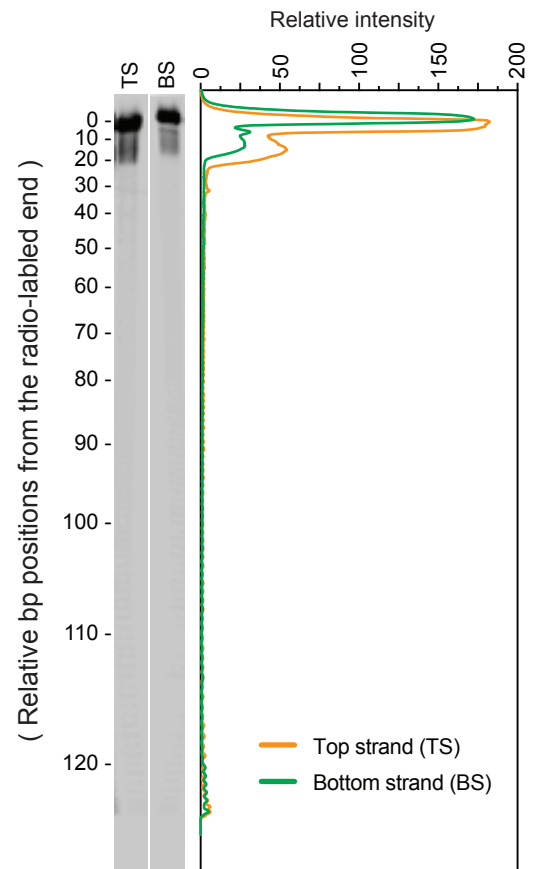

Supplement: supp_gad.304782.117_Supplemental_Figure_S2_.pdf [file supp_gad.304782.117_Supplemental_Figure_S2_.pdf]
